# Supplementary material for: Infrared spectroscopic study of solvation and size effects on reactions between water molecules and neutral rare-earth metals
Source: Royal Society of Chemistry journal article supplement (doi:10.1039/d3na00873h), 2023-01-01
Supplement: d3na00873h1.pdf [file d3na00873h1.pdf]

## Supporting Information

### **Infrared spectroscopic study of solvation and size effects on the reactions between water molecules with neutral rare-earth metals**

Tiantong Wang,<sup>1,2</sup> Shangdong Li,<sup>1,2</sup> Wenhui Yan,<sup>1,2</sup> Shuai Jiang,<sup>1,2</sup> Hua Xie,<sup>1</sup> Gang Li,<sup>1,\*</sup> and Ling Jiang<sup>1,3,\*</sup>

1. State Key Laboratory of Molecular Reaction Dynamics, Dalian Institute of Chemical Physics, Chinese Academy of Sciences, Dalian 116023, China.
2. University of Chinese Academy of Sciences, Beijing 100049, China.
3. Hefei National Laboratory, Hefei 230088, China.

\* Corresponding authors.

*E-mail addresses:* gli@dicp.ac.cn (G. Li), ljiang@dicp.ac.cn (L. Jiang).

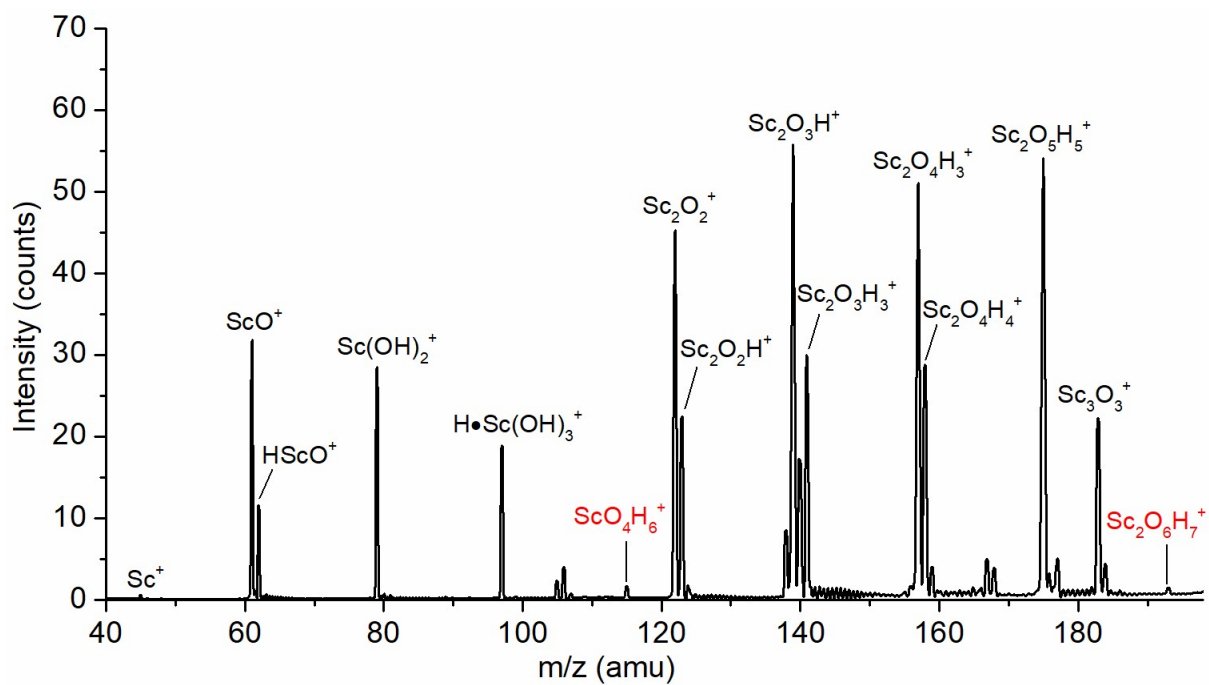

**Fig. S1** Time-of-flight mass spectra of the species formed from the reactions between water molecules and scandium metals.

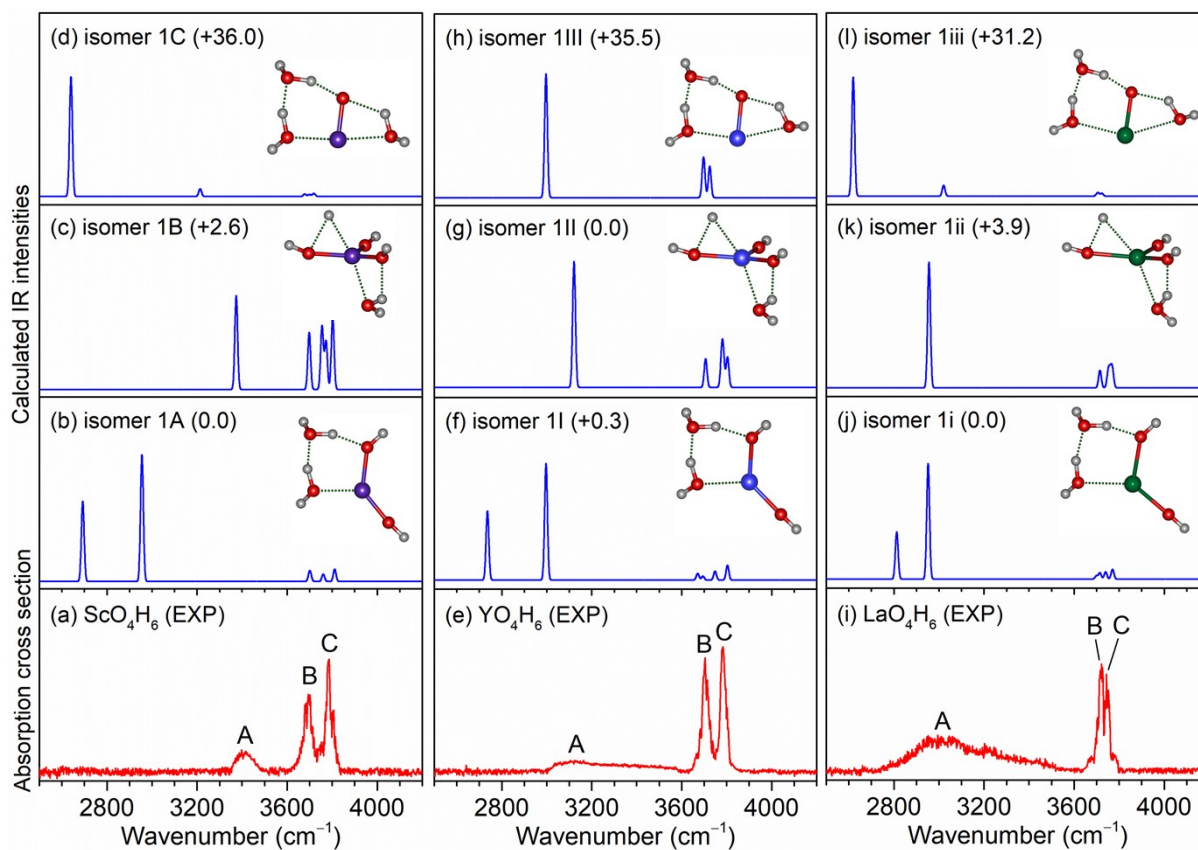

**Fig. S2** Comparison of experimental IR spectra of neutral  $\text{MO}_4\text{H}_6$  ( $\text{M} = \text{Sc}, \text{Y}, \text{La}$ ) complexes and calculated IR spectra of the three types of isomers. Calculations were carried out at the TPSSh/def2-TZVP level of theory, with the harmonic vibrational frequencies scaled by a factor of 0.968. Relative energies (in parenthesis) are listed in kcal/mol. The structures are embedded in the inset (O, red; H, light gray; Sc, purple; Y, blue; La, olive).

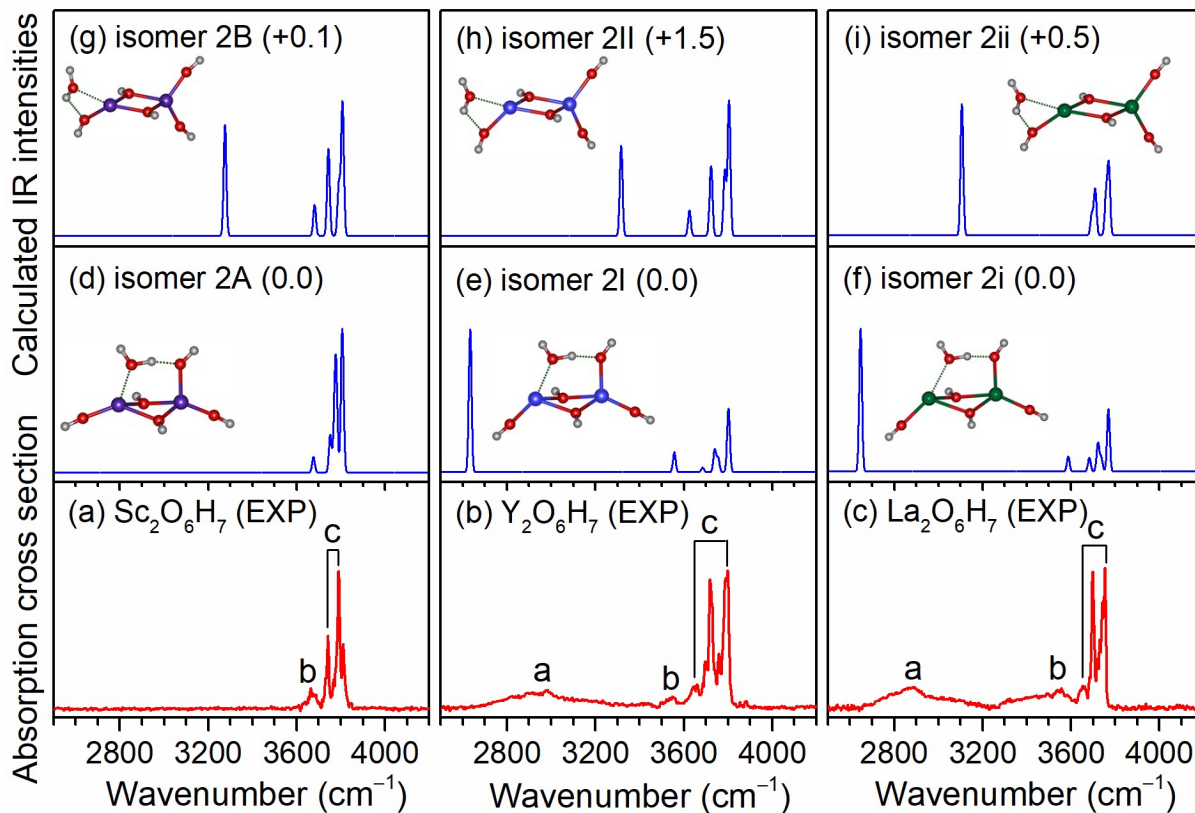

**Fig. S3** Comparison of experimental IR spectra of neutral  $M_2O_6H_7$  ( $M = Sc, Y, La$ ) complexes and calculated IR spectra of the two types of isomers. Calculations were carried out at the TPSSh/def2-TZVP level of theory, with the harmonic vibrational frequencies scaled by a factor of 0.968. Relative energies (in parenthesis) are listed in kcal/mol. The structures are embedded in the inset (O, red; H, light gray; Sc, purple; Y, blue; La, olive).

**Table S1.** Comparison of the experimental band positions of  $\text{MO}_4\text{H}_6$  ( $M = \text{Sc}, \text{Y}, \text{La}$ ) with the calculated values of isomers 1B, 1II, and 1ii obtained at the THSSh/def2-TZVP level of theory (IR intensities are listed in parentheses in  $\text{km/mol}$  and the harmonic vibrational frequencies scaled by a factor of 0.968). The atoms are labeled for discussions.

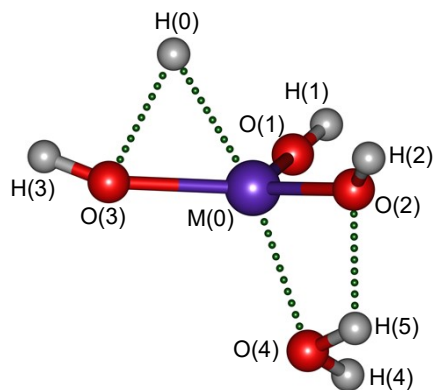

| Species                  | Label | Exptl     | Calcd                                 | Mode                                                              |
|--------------------------|-------|-----------|---------------------------------------|-------------------------------------------------------------------|
| $\text{ScO}_4\text{H}_6$ | A     | 3398      | 3374 (162)                            | Symmetric stretching mode of the O(4)H(4) and O(4)H(5) groups     |
|                          | B     | 3694      | 3698 (98)                             | Antisymmetric stretching mode of the O(4)H(4) and O(4)H(5) groups |
|                          |       |           | 3758 (109)                            | Stretching mode of the O(3)H(3) group                             |
|                          | C     | 3786      | 3772 (83)                             | Stretching mode of the O(2)H(2) group                             |
|                          |       |           | 3802 (125)                            | Stretching mode of the O(1)H(1) group                             |
| $\text{YO}_4\text{H}_6$  | A     | 3104      | 3121 (397)                            | Symmetric stretching mode of the O(4)H(4) and O(4)H(5) groups     |
|                          | B     | 3704      | 3706 (89)                             | Antisymmetric stretching mode of the O(4)H(4) and O(4)H(5) groups |
|                          |       |           | 3779 (106)                            | Stretching mode of the O(3)H(3) group                             |
|                          | C     | 3784      | 3785 (67)                             | Stretching mode of the O(2)H(2) group                             |
|                          |       | 3803 (94) | Stretching mode of the O(1)H(1) group |                                                                   |
| $\text{LaO}_4\text{H}_6$ | A     | 2952      | 2956 (579)                            | Symmetric stretching mode of the O(4)H(4) and O(4)H(5) groups     |
|                          | B     | 3722      | 3714 (80)                             | Antisymmetric stretching mode of the O(4)H(4) and O(4)H(5) groups |
|                          |       |           | 3751 (80)                             | Stretching mode of the O(3)H(3) group                             |
|                          | C     | 3748      | 3762 (54)                             | Stretching mode of the O(2)H(2) group                             |
|                          |       | 3769 (74) | Stretching mode of the O(1)H(1) group |                                                                   |

**Table S2.** Comparison of the experimental band positions of  $M_2O_6H_7$  ( $M = Sc, Y, La$ ) with the calculated values of isomers 2A, 2I, and 2i obtained at the THSSh/def2-TZVP level of theory (IR intensities are listed in parentheses in km/mol and the harmonic vibrational frequencies scaled by a factor of 0.968). The atoms are labeled for discussions.

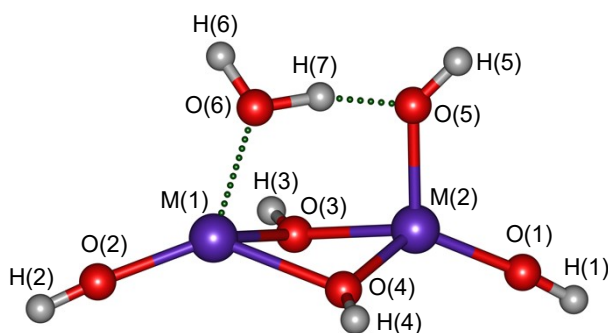

| Species                                       | Label | Exptl | Calcd      | Mode                                  |
|-----------------------------------------------|-------|-------|------------|---------------------------------------|
| Sc <sub>2</sub> O <sub>6</sub> H <sub>7</sub> |       |       | 2474 (533) | stretching mode of the O(6)H(7) group |
|                                               | b     | 3662  | 3675 (38)  | stretching mode of the O(6)H(6) group |
|                                               |       | 3742  | 3751 (92)  | stretching mode of the O(5)H(5) group |
|                                               | c     | 3788  | 3770 (126) | stretching mode of the O(4)H(4) group |
|                                               |       |       | 3778 (210) | stretching mode of the O(3)H(3) group |
|                                               |       | 3810  | 3804 (209) | stretching mode of the O(2)H(2) group |
|                                               |       |       | 3806 (154) | stretching mode of the O(1)H(1) group |
| Y <sub>2</sub> O <sub>6</sub> H <sub>7</sub>  | a     | 2930  | 2631 (609) | stretching mode of the O(6)H(7) group |
|                                               | b     | 3548  | 3555 (83)  | stretching mode of the O(6)H(6) group |
|                                               |       | 3694  | 3684 (18)  | stretching mode of the O(3)H(3) group |
|                                               | c     | 3758  | 3738 (95)  | stretching mode of the O(4)H(4) group |
|                                               |       |       | 3754 (59)  | stretching mode of the O(5)H(5) group |
|                                               |       | 3798  | 3799 (140) | stretching mode of the O(2)H(2) group |
|                                               |       |       | 3802 (135) | stretching mode of the O(1)H(1) group |
| La <sub>2</sub> O <sub>6</sub> H <sub>7</sub> | a     | 2880  | 2643 (528) | stretching mode of the O(6)H(7) group |
|                                               | b     | 3556  | 3586 (54)  | stretching mode of the O(6)H(6) group |
|                                               |       | 3656  | 3681 (48)  | stretching mode of the O(3)H(3) group |
|                                               | c     | 3698  | 3721 (104) | stretching mode of the O(4)H(4) group |
|                                               |       |       | 3735 (49)  | stretching mode of the O(5)H(5) group |
|                                               |       | 3754  | 3767 (126) | stretching mode of the O(2)H(2) group |
|                                               |       |       | 3768 (102) | stretching mode of the O(1)H(1) group |

Cartesian coordinates of the low-lying isomers, intermediates, and transition states for  $\text{MO}_4\text{H}_6$  and  $\text{M}_2\text{O}_6\text{H}_7$  shown in Figures 1-5, S2, and S3 calculated at the THSSh/def2-TZVP level of theory.

Isomer 1A

|    |             |             |             |
|----|-------------|-------------|-------------|
| Sc | -0.74745000 | -0.03500500 | -0.03023800 |
| H  | -3.57406400 | 0.03125600  | 0.02488500  |
| O  | -2.62114400 | 0.09295600  | -0.02194200 |
| H  | 0.54727300  | -2.47331800 | 0.20529400  |
| O  | 0.54519500  | -1.52381100 | 0.06506900  |
| H  | 1.64149800  | 1.10240000  | 0.00843800  |
| O  | 2.72317100  | -0.05127700 | 0.03435100  |
| H  | 0.76526900  | 2.34555400  | 0.56255100  |
| O  | 0.73391000  | 1.56954600  | -0.00889100 |
| H  | 2.03759700  | -0.78988300 | 0.06166400  |
| H  | 3.22982200  | -0.18020800 | -0.77653900 |

Isomer 1B

|    |             |             |             |
|----|-------------|-------------|-------------|
| O  | -1.56476300 | 0.00341600  | 1.25012300  |
| H  | -1.99293900 | 0.84987600  | 1.43194400  |
| O  | 1.67941900  | -1.02189900 | 0.65781000  |
| H  | 2.61112600  | -0.99293400 | 0.89017000  |
| O  | -1.15472700 | -0.88965700 | -1.14512500 |
| H  | -1.27312400 | -1.58466500 | -1.79504800 |
| H  | 1.89743100  | -0.81039000 | -1.21870400 |
| H  | -2.05130200 | -0.42890300 | 0.51166300  |
| O  | 0.46456000  | 1.87778500  | -0.31999600 |
| H  | 0.50590700  | 2.76173200  | -0.68368900 |
| Sc | 0.23366600  | 0.02133900  | -0.12756400 |

Isomer 1C

|    |             |             |             |
|----|-------------|-------------|-------------|
| O  | -0.11342100 | -1.12591000 | -0.10252900 |
| Sc | -0.58141600 | 0.57198800  | -0.08181300 |
| O  | 1.45715700  | 1.29721500  | 0.00765400  |
| H  | 1.88117400  | 2.00375300  | 0.50610200  |
| H  | 2.02887800  | 0.43107900  | 0.06563000  |
| O  | -2.61435700 | -0.40309500 | 0.03883100  |
| H  | -2.01592600 | -1.19573600 | 0.08132000  |
| H  | -3.17678000 | -0.40738700 | 0.82426000  |
| O  | 2.42087600  | -1.03657800 | 0.15524100  |
| H  | 2.86486500  | -1.40328800 | -0.61856700 |
| H  | 1.42549300  | -1.29323400 | 0.06575500  |

Isomer 2A

|    |             |             |             |
|----|-------------|-------------|-------------|
| H  | -0.04079200 | -0.73316800 | -2.24122300 |
| H  | -0.01875600 | -0.66354000 | 2.26153200  |
| Sc | 1.54297900  | -0.19316100 | -0.01269200 |
| Sc | -1.62290900 | -0.20300100 | -0.01092100 |
| O  | 1.37995500  | 1.78873100  | -0.09027700 |
| H  | 1.99956000  | 2.51582000  | 0.00895500  |

|   |             |             |             |
|---|-------------|-------------|-------------|
| O | 3.26587800  | -0.94085800 | 0.05209800  |
| H | 4.09920500  | -1.40944600 | 0.07465900  |
| O | -1.15915200 | 1.93445200  | 0.09827600  |
| H | -1.55127700 | 2.51081900  | -0.56999600 |
| O | -3.39949300 | -0.82226700 | 0.02583200  |
| H | -4.27076500 | -1.21605400 | 0.03435800  |
| O | 0.06428400  | -0.56907800 | 1.31137600  |
| O | 0.04771500  | -0.73209200 | -1.28647600 |
| H | -0.13214800 | 2.04387000  | 0.04096000  |

Isomer 2B

|    |             |             |             |
|----|-------------|-------------|-------------|
| H  | -0.01845500 | 1.82936900  | 1.17906200  |
| H  | -0.29312200 | -2.00160600 | -1.20161700 |
| Sc | -1.77523700 | 0.02302300  | 0.01181700  |
| Sc | 1.46814900  | -0.18292200 | -0.07553800 |
| O  | -2.76706200 | 0.70513900  | -1.43087900 |
| H  | -3.48228000 | 1.01408100  | -1.98560100 |
| O  | -2.76346600 | -0.55389200 | 1.50092200  |
| H  | -3.47545600 | -0.79354000 | 2.09281300  |
| O  | 3.06717700  | 1.42517900  | 0.25240300  |
| H  | 3.68362400  | 0.66187700  | 0.12245400  |
| O  | 3.17874300  | -1.12359200 | -0.07464400 |
| H  | 3.71630000  | -1.90428400 | 0.06122300  |
| O  | -0.24248800 | -1.24542900 | -0.61019400 |
| O  | -0.08790900 | 1.10358600  | 0.55260700  |
| H  | 3.23827400  | 2.06406800  | -0.45190300 |

Isomer 1I

|   |             |             |             |
|---|-------------|-------------|-------------|
| Y | -0.61662100 | 0.02283600  | -0.20728400 |
| H | -3.43049700 | -0.01019700 | 0.72971800  |
| O | -2.53164800 | 0.02990700  | 0.40510200  |
| H | 0.72490800  | -2.47996500 | 0.39885100  |
| O | 0.72753000  | -1.56516500 | 0.10568500  |
| H | 1.94901900  | 1.08000600  | 0.19956000  |
| O | 2.96848500  | -0.15419000 | 0.18918800  |
| H | 1.19769600  | 2.46825300  | -0.15820300 |
| O | 1.06711400  | 1.58911300  | 0.21921500  |
| H | 2.25482200  | -0.86161000 | 0.16615800  |
| H | 3.50040300  | -0.28441100 | -0.60551200 |

Isomer 1II

|   |             |             |             |
|---|-------------|-------------|-------------|
| Y | 0.21490100  | 0.03685200  | -0.10165700 |
| O | -1.74242400 | -0.20180000 | 1.30396000  |
| H | -2.23686000 | 0.54280100  | 1.66696100  |
| O | 1.73774000  | -1.26029300 | 0.53257500  |
| H | 2.55561600  | -1.74450400 | 0.65795800  |
| O | -1.46051100 | -0.66323800 | -1.18835400 |
| H | -1.84795500 | -1.09756500 | -1.94888400 |
| H | 1.90284800  | -0.96671400 | -1.29056600 |
| H | -2.15378900 | -0.45676700 | 0.43064000  |
| O | 0.54540600  | 2.03975600  | -0.07489200 |
| H | 0.75731000  | 2.97011900  | -0.13781700 |



## Isomer 1III

|   |             |             |             |
|---|-------------|-------------|-------------|
| O | -0.06310600 | 1.28224800  | 0.01128600  |
| O | -1.72552400 | -1.13358600 | 0.04859700  |
| H | -2.29959300 | -1.87001400 | -0.18466300 |
| H | -2.25509900 | -0.22321300 | 0.00889900  |
| O | 2.46217400  | 0.85984300  | -0.08696400 |
| H | 1.69782300  | 1.50978800  | -0.01133700 |
| H | 3.13267600  | 1.07979800  | 0.57075200  |
| O | -2.57435900 | 1.21454800  | -0.10230000 |
| H | -2.96723900 | 1.61558500  | 0.68187300  |
| H | -1.54971700 | 1.44428700  | -0.07215300 |
| Y | 0.49865800  | -0.54719600 | 0.00106900  |

## Isomer 2I

|   |             |             |             |
|---|-------------|-------------|-------------|
| H | 0.05583500  | -0.47055400 | 2.38963900  |
| H | 0.28056600  | -0.83378000 | -2.14260900 |
| O | -1.58128700 | 1.94816700  | -0.16581600 |
| H | -2.12672300 | 2.72881800  | -0.28740100 |
| O | -3.44436000 | -1.16003200 | -0.11487800 |
| H | -4.25593000 | -1.66517400 | -0.14685200 |
| O | 1.01634200  | 2.12308200  | -0.21840000 |
| H | 1.33420600  | 2.71548900  | 0.48328500  |
| O | 3.40105900  | -1.06176200 | -0.52805400 |
| H | 4.18521400  | -1.55485800 | -0.76736500 |
| O | 0.09291400  | -0.55540200 | -1.24181200 |
| O | -0.05418400 | -0.55935200 | 1.43618700  |
| H | -0.00518600 | 2.20119000  | -0.24020100 |
| Y | -1.67623400 | -0.16643800 | -0.00663200 |
| Y | 1.80669900  | -0.06429900 | 0.19570100  |

## Isomer 2II

|   |             |             |             |
|---|-------------|-------------|-------------|
| H | -0.15069200 | -1.48617500 | 1.62918400  |
| H | 0.27145700  | 1.47847500  | -1.91323100 |
| Y | 1.88602400  | -0.00611100 | 0.06683500  |
| Y | -1.66229800 | 0.02097700  | -0.32425600 |
| O | 3.10376700  | -1.21262900 | -1.02195000 |
| H | 3.75771800  | -1.74676800 | -1.47070900 |
| O | 2.78374400  | 1.23066900  | 1.40739700  |
| H | 3.34973700  | 1.75156700  | 1.97560100  |
| O | -3.34158100 | -1.26986600 | 0.89884900  |
| H | -3.89774300 | -0.46137700 | 0.78932600  |
| O | -3.31317700 | 1.22524700  | 0.04126800  |
| H | -3.77179000 | 2.05677800  | 0.16704500  |
| O | 0.21031700  | 0.93340100  | -1.12210100 |
| O | -0.00820600 | -0.93120700 | 0.85587500  |
| H | -3.76291100 | -1.97721600 | 0.38750200  |

## Isomer 1i

|    |             |             |             |
|----|-------------|-------------|-------------|
| La | -0.50738300 | 0.06833500  | -0.07675000 |
| H  | -3.60150600 | -0.10464000 | 0.31639200  |
| O  | -2.66200900 | -0.05603600 | 0.13252500  |
| H  | 0.86403000  | -2.65491400 | 0.42547000  |
| O  | 0.85358000  | -1.72448400 | 0.18496900  |

|   |            |             |             |
|---|------------|-------------|-------------|
| H | 2.24143200 | 1.07049900  | 0.09276200  |
| O | 3.07444500 | -0.32432400 | -0.00664900 |
| H | 1.71031000 | 2.44949600  | 0.70890500  |
| O | 1.46332000 | 1.71465500  | 0.13677100  |
| H | 2.34605000 | -1.01716300 | 0.08749300  |
| H | 3.52581700 | -0.51687100 | -0.83720800 |

Isomer 1ii

|    |             |             |             |
|----|-------------|-------------|-------------|
| O  | -2.04917300 | -0.29000900 | 1.26324000  |
| H  | -2.63572400 | 0.32857400  | 1.71276400  |
| O  | 1.77140200  | -1.52968900 | 0.42509300  |
| H  | 2.51769800  | -2.13252500 | 0.47083400  |
| O  | -1.69670800 | -0.43298500 | -1.25405000 |
| H  | -2.17623500 | -0.72653300 | -2.03119100 |
| H  | 1.85876000  | -1.21397400 | -1.37436100 |
| H  | -2.35703900 | -0.39309100 | 0.30966400  |
| O  | 0.77957000  | 2.13794900  | 0.06668800  |
| H  | 1.08282900  | 3.04719400  | 0.05854200  |
| La | 0.19770100  | 0.03523200  | -0.05533400 |

Isomer 1iii

|    |             |             |             |
|----|-------------|-------------|-------------|
| O  | -0.21102600 | 1.41075400  | -0.05656700 |
| O  | -1.99375600 | -1.05576900 | 0.10623700  |
| H  | -2.62410900 | -1.74881400 | -0.11538000 |
| H  | -2.46882500 | -0.13710500 | 0.05535900  |
| O  | 2.37618900  | 1.28803600  | -0.01397300 |
| H  | 1.51666100  | 1.80573000  | 0.00319600  |
| H  | 2.97540100  | 1.66235500  | 0.64178400  |
| O  | -2.75481100 | 1.35811200  | -0.09311600 |
| H  | -3.11316800 | 1.80255800  | 0.68401600  |
| H  | -1.74143900 | 1.57222200  | -0.10568100 |
| La | 0.45829300  | -0.50817600 | -0.01235000 |

Isomer 2i

|    |             |             |             |
|----|-------------|-------------|-------------|
| H  | 0.14177500  | -0.71714500 | 2.40212800  |
| H  | 0.22333100  | -0.81891700 | -2.26760100 |
| O  | -1.70334900 | 2.12765400  | -0.11352800 |
| H  | -2.20531600 | 2.93955800  | -0.22650300 |
| O  | -3.74373300 | -1.22181900 | -0.14232100 |
| H  | -4.56101200 | -1.72004300 | -0.19575100 |
| O  | 0.90097400  | 2.31834900  | -0.18578400 |
| H  | 1.19046300  | 2.90328200  | 0.53200600  |
| O  | 3.70122600  | -1.17358900 | -0.49197700 |
| H  | 4.48055200  | -1.67735900 | -0.73298300 |
| O  | 0.05697900  | -0.50668000 | -1.37266300 |
| O  | 0.00451500  | -0.69388300 | 1.44801000  |
| H  | -0.12089200 | 2.36785200  | -0.20332400 |
| La | -1.83517700 | -0.15585300 | 0.01268600  |
| La | 1.96005800  | -0.02094500 | 0.11991300  |

Isomer 2ii

|   |             |             |             |
|---|-------------|-------------|-------------|
| H | 0.04435900  | 1.44953000  | 1.83988900  |
| H | -0.21705500 | -1.55373900 | -1.93528200 |

|                                 |             |             |             |
|---------------------------------|-------------|-------------|-------------|
| La                              | -2.06105900 | 0.01074200  | 0.04667100  |
| La                              | 1.82781100  | -0.04035000 | -0.19389400 |
| O                               | -3.30827600 | 1.34625500  | -1.16205400 |
| H                               | -3.92571100 | 1.90416000  | -1.63755100 |
| O                               | -3.14902600 | -1.31980400 | 1.40683600  |
| H                               | -3.73417000 | -1.85427600 | 1.94594600  |
| O                               | 3.85885700  | 1.27226000  | 0.88621700  |
| H                               | 4.29979900  | 0.42168500  | 0.60532000  |
| O                               | 3.80680700  | -1.13585800 | -0.09288800 |
| H                               | 4.37206700  | -1.90100700 | 0.03307700  |
| O                               | -0.16802100 | -0.98037800 | -1.16264800 |
| O                               | -0.02560500 | 0.96972900  | 1.00734400  |
| H                               | 4.33796600  | 2.00370000  | 0.47787100  |
|                                 |             |             |             |
| H <sub>2</sub>                  |             |             |             |
| H                               | 0.00000000  | 0.00000000  | 0.37118300  |
| H                               | 0.00000000  | 0.00000000  | -0.37118300 |
|                                 |             |             |             |
| ScO                             |             |             |             |
| O                               | 0.00000000  | 0.00000000  | -1.20379000 |
| Sc                              | 0.00000000  | 0.00000000  | 0.45858700  |
|                                 |             |             |             |
| OH                              |             |             |             |
| O                               | 0.00000000  | 0.00000000  | 0.10877400  |
| H                               | 0.00000000  | 0.00000000  | -0.87019400 |
|                                 |             |             |             |
| H <sub>2</sub> O                |             |             |             |
| O                               | 0.00000000  | 0.00000000  | 0.11775500  |
| H                               | 0.00000000  | 0.76397200  | -0.47102000 |
| H                               | 0.00000000  | -0.76397200 | -0.47102000 |
|                                 |             |             |             |
| HSc(OH) <sub>3</sub>            |             |             |             |
| O                               | -1.75326900 | -0.74390900 | -0.20429600 |
| H                               | -2.65691300 | -0.41110400 | -0.19216800 |
| O                               | 1.50898500  | -1.14966200 | -0.06184500 |
| H                               | 2.23698900  | -1.75702200 | -0.18770700 |
| H                               | -1.36144400 | -0.49417100 | 1.50010100  |
| O                               | 0.25553700  | 1.86359400  | -0.06579100 |
| H                               | 0.65731700  | 2.72523200  | -0.17822200 |
| Sc                              | 0.04924000  | 0.00842300  | 0.08159300  |
|                                 |             |             |             |
| HSc <sub>2</sub> O <sub>2</sub> |             |             |             |
| Sc                              | 1.34274400  | 0.00013000  | 0.06921200  |
| Sc                              | -1.43266600 | -0.00002700 | -0.03793900 |
| O                               | -0.05763600 | -1.27707400 | 0.02729100  |
| O                               | -0.05759600 | 1.27702400  | 0.02708400  |
| H                               | 2.81022500  | -0.00175200 | -1.09172700 |
|                                 |             |             |             |
| HScO                            |             |             |             |
| Sc                              | 0.05509400  | -0.41674300 | 0.00000000  |
| H                               | -1.59773100 | -1.31101400 | 0.00000000  |
| O                               | 0.05509400  | 1.25782700  | 0.00000000  |

|                                        |             |             |             |
|----------------------------------------|-------------|-------------|-------------|
| Sc(OH) <sub>2</sub> (H <sub>2</sub> O) |             |             |             |
| O                                      | -1.60424900 | -1.27653800 | -0.10139200 |
| H                                      | -2.40197800 | -0.81051200 | -0.40252300 |
| O                                      | 1.92887300  | -0.62033400 | -0.05187500 |
| H                                      | 2.86876500  | -0.77564800 | -0.13610800 |
| H                                      | -1.79887600 | -1.61215100 | 0.79632700  |
| O                                      | -0.55412500 | 1.79558300  | -0.01849300 |
| H                                      | -0.61870000 | 2.74770600  | -0.09014900 |
| Sc                                     | 0.18032400  | 0.06004400  | 0.05745400  |

|                     |             |             |            |
|---------------------|-------------|-------------|------------|
| Sc(OH) <sub>2</sub> |             |             |            |
| Sc                  | 0.00000000  | 0.41742200  | 0.00000000 |
| O                   | 1.65995300  | -0.41177800 | 0.00000000 |
| H                   | 2.33425600  | -1.09183100 | 0.00000000 |
| O                   | -1.66004100 | -0.41099500 | 0.00000000 |
| H                   | -2.33355300 | -1.09184800 | 0.00000000 |

|                       |             |             |             |
|-----------------------|-------------|-------------|-------------|
| ScO(H <sub>2</sub> O) |             |             |             |
| O                     | 0.76586200  | 1.16918000  | 0.01248200  |
| Sc                    | 0.51478600  | -0.50530100 | 0.00310800  |
| O                     | -1.65203700 | 0.04874700  | -0.08848100 |
| H                     | -2.37465300 | -0.10888900 | 0.53366800  |
| H                     | -1.34644200 | 0.97679900  | 0.00905300  |

|     |             |             |             |
|-----|-------------|-------------|-------------|
| IM1 |             |             |             |
| Sc  | -0.83527600 | -0.05954600 | -0.28782800 |
| Sc  | 1.91044500  | 0.04261400  | 0.16543000  |
| O   | 0.59843800  | -1.28370200 | 0.01614900  |
| O   | 0.51434600  | 1.26822800  | -0.11887800 |
| H   | -2.19640200 | -0.12992400 | -1.69291900 |
| O   | -2.85616400 | -0.00460400 | 0.57039100  |
| H   | -3.02005000 | -0.02758100 | -0.44689400 |
| H   | -3.41505700 | 0.67369500  | 0.96887900  |

|     |             |             |             |
|-----|-------------|-------------|-------------|
| IM2 |             |             |             |
| Sc  | 1.68397200  | -0.41126600 | -0.06035800 |
| Sc  | -0.86949600 | 0.72470700  | 0.02459800  |
| O   | 0.94436600  | 1.31531000  | -0.01429700 |
| O   | -0.10926500 | -1.04712700 | -0.03090000 |
| H   | 3.17404300  | -1.06642100 | 0.90095900  |
| O   | -2.69202300 | -0.67609400 | 0.09067000  |
| H   | -2.00596100 | -1.38071800 | 0.00150600  |
| H   | -3.41670800 | -0.87184100 | -0.51529000 |

|     |             |             |             |
|-----|-------------|-------------|-------------|
| IM3 |             |             |             |
| H   | -0.49807300 | 2.38516800  | 0.13181300  |
| Sc  | 1.05292200  | -0.00848200 | -0.01999400 |
| Sc  | -1.83479200 | -0.11225900 | -0.10529200 |
| O   | 2.94079900  | -0.07324500 | -0.07402000 |
| H   | 3.85785000  | -0.34831600 | -0.06059900 |
| O   | -0.46210300 | 1.42378500  | 0.15029500  |
| O   | -0.38615300 | -1.23504800 | 0.23362300  |
| H   | -3.68084200 | -0.42523000 | 0.08059900  |

|     |             |             |             |
|-----|-------------|-------------|-------------|
| IM4 |             |             |             |
| H   | -0.52315800 | 3.78879600  | -0.12397500 |
| Sc  | 0.96165600  | -0.07825200 | -0.22796700 |
| Sc  | -1.80247300 | -0.19165000 | 0.13242600  |
| O   | 2.78710700  | -0.05555400 | 0.29441900  |
| H   | 3.64738700  | -0.05547400 | 0.71331300  |
| O   | -0.49488700 | 1.14724300  | 0.03369800  |
| O   | -0.41049800 | -1.41598500 | -0.12531200 |
| H   | -0.52084900 | 4.52898500  | -0.20541300 |
| IM5 |             |             |             |
| Sc  | 0.90798000  | -0.00001100 | 0.14731300  |
| Sc  | -1.87154000 | -0.00006200 | -0.11794700 |
| O   | -0.51464600 | -1.28412700 | 0.01419400  |
| O   | -0.51441500 | 1.28403500  | 0.01120000  |
| H   | 1.44552500  | 0.00599600  | 2.50187500  |
| O   | 2.67703600  | -0.00087900 | -0.55396500 |
| H   | 2.12842200  | 0.00468500  | 2.18909200  |
| H   | 3.47701000  | -0.00138600 | -1.07907000 |
| IM6 |             |             |             |
| Sc  | 0.94636200  | 0.00000800  | -0.23094700 |
| Sc  | -1.81890600 | -0.00000200 | 0.12559600  |
| O   | 2.77350500  | 0.00008500  | 0.28982700  |
| H   | 3.63386100  | -0.00060400 | 0.70850300  |
| O   | -0.46865700 | 1.28453500  | -0.05090900 |
| O   | -0.46865400 | -1.28456100 | -0.05093500 |
| IM7 |             |             |             |
| Sc  | 1.34873200  | -0.05126300 | -0.16728700 |
| Sc  | -1.36019600 | 0.66142000  | -0.00206400 |
| O   | 3.11439200  | -0.62239100 | 0.28204500  |
| H   | 3.97345500  | -0.85239800 | 0.63432600  |
| O   | 0.32467400  | 1.52023000  | 0.15189200  |
| O   | -0.34768800 | -0.94948800 | -0.31850100 |
| O   | -2.88414800 | -1.06545800 | 0.13874800  |
| H   | -2.04370800 | -1.57728200 | -0.00588100 |
| H   | -3.34685900 | -1.44675400 | 0.89445400  |
| IM8 |             |             |             |
| H   | -0.00023500 | 2.42349600  | -0.08662600 |
| Sc  | -1.45565600 | -0.02309700 | 0.04047200  |
| Sc  | 1.45571900  | -0.02317500 | 0.03971900  |
| O   | -3.34616400 | -0.16008500 | 0.07542800  |
| H   | -4.24595000 | -0.48560400 | 0.04430300  |
| O   | 3.34623600  | -0.15996400 | 0.07598700  |
| H   | 4.24594200  | -0.48583100 | 0.04609300  |
| O   | -0.00015000 | -1.20319700 | -0.22167700 |
| O   | -0.00005600 | 1.46320300  | -0.14071200 |
| IM9 |             |             |             |
| H   | -0.15971300 | -0.00249700 | 2.39932900  |

|    |             |             |             |
|----|-------------|-------------|-------------|
| Sc | -1.62725400 | 0.04174900  | -0.05097200 |
| Sc | 1.32759700  | -0.18756300 | -0.00894200 |
| O  | -3.49082800 | -0.29516900 | -0.09650200 |
| H  | -4.36904900 | -0.60266500 | -0.31972500 |
| O  | 2.97718200  | -1.11972800 | -0.03349900 |
| H  | 3.61264500  | -1.78647800 | -0.29607200 |
| O  | -0.11417600 | -0.43064900 | -1.16069400 |
| O  | -0.15118200 | -0.10675000 | 1.44336900  |
| O  | 1.40011800  | 2.03462500  | -0.10083400 |
| H  | 0.42259600  | 2.24009700  | -0.13597100 |
| H  | 1.81738900  | 2.55500300  | -0.80407400 |

IM10

|    |             |             |             |
|----|-------------|-------------|-------------|
| H  | -0.15263500 | -0.00359700 | 2.29233600  |
| H  | -0.15422200 | 0.00225900  | -2.29204300 |
| Sc | 1.42645800  | 0.00014900  | -0.00021500 |
| Sc | -1.78736300 | -0.00091600 | 0.00048000  |
| O  | 2.41984800  | -1.58798600 | -0.00156900 |
| H  | 3.13343200  | -2.22509200 | -0.00135800 |
| O  | 2.41745500  | 1.58972300  | 0.00111400  |
| H  | 3.12927400  | 2.22879000  | 0.00211100  |
| O  | -3.66625000 | 0.00118500  | -0.00061400 |
| H  | -4.62247600 | 0.00263400  | -0.00077500 |
| O  | -0.19547000 | 0.00056400  | -1.33173300 |
| O  | -0.19487900 | -0.00209900 | 1.33207000  |

IM11

|    |             |             |             |
|----|-------------|-------------|-------------|
| Sc | -1.83485500 | 0.00000300  | -0.29965500 |
| Sc | 0.95800200  | -0.00000400 | -0.01621000 |
| O  | -0.40560500 | -1.35028500 | 0.54005300  |
| O  | -0.40560100 | 1.35028300  | 0.54004800  |
| O  | 2.83187200  | 0.00000700  | -0.23146100 |
| H  | -0.28525800 | -0.00000400 | -1.47783300 |
| H  | 3.75708700  | 0.00001800  | -0.47720300 |
| H  | -0.61160300 | -2.21413000 | 0.89951000  |
| H  | -0.61165400 | 2.21408600  | 0.89957200  |

IM12

|    |             |             |             |
|----|-------------|-------------|-------------|
| Sc | -1.70234300 | -0.00165600 | 0.34720500  |
| Sc | 1.03192600  | 0.00202200  | -0.11666800 |
| O  | -0.48163600 | -1.36778400 | -0.59818400 |
| O  | -0.48523600 | 1.36967300  | -0.59501700 |
| O  | 2.79997200  | -0.00215900 | 0.48573200  |
| H  | -3.30624100 | -0.00503800 | 1.28787600  |
| H  | 3.69170200  | -0.00241500 | 0.83199800  |
| H  | -0.48258700 | -2.32780100 | -0.65274800 |
| H  | -0.48891500 | 2.32972800  | -0.64866500 |

IM13

|    |             |             |             |
|----|-------------|-------------|-------------|
| H  | 0.07582200  | 2.29305600  | 0.11589900  |
| Sc | -1.56183800 | 0.00027600  | -0.04448200 |
| Sc | 1.61383500  | 0.00175400  | 0.35366300  |
| O  | -3.42428400 | -0.00247000 | -0.26071200 |

|   |             |             |             |
|---|-------------|-------------|-------------|
| H | -4.37472300 | -0.00323100 | -0.36747500 |
| O | 0.03700200  | 1.33230300  | 0.14155200  |
| O | 0.03704900  | -1.33025700 | 0.14950400  |
| H | 0.07821000  | -2.29076700 | 0.11894200  |
| H | 2.28840500  | 0.01060000  | 2.06162200  |
| O | 2.99244500  | -0.00524100 | -0.89150800 |
| H | 3.70266400  | -0.00696300 | -1.53247600 |

IM14

|    |             |             |             |
|----|-------------|-------------|-------------|
| H  | -0.22030000 | 0.14182500  | 2.26823300  |
| Sc | 1.40236300  | -0.06959000 | 0.00165600  |
| Sc | -1.79394500 | 0.41614900  | -0.00636500 |
| O  | 2.64885300  | 1.31891900  | -0.01423600 |
| H  | 3.33774500  | 1.98186500  | -0.03004000 |
| O  | -0.21638700 | 0.19978200  | 1.30837700  |
| O  | -0.22093200 | 0.14977900  | -1.31217700 |
| H  | -0.22696100 | 0.01590500  | -2.26445400 |
| H  | -2.42496400 | 2.14179900  | -0.03692200 |
| O  | -3.19305000 | -0.80862100 | 0.01332100  |
| H  | -3.91264600 | -1.43849300 | 0.02346000  |
| O  | 2.09236600  | -1.81520100 | 0.01872300  |
| H  | 2.78355300  | -2.47789300 | 0.02656400  |

IM15

|    |             |             |             |
|----|-------------|-------------|-------------|
| Sc | -1.65663700 | -0.00905600 | -0.00349100 |
| Sc | 1.59571100  | 0.04350300  | 0.03910400  |
| O  | -0.01084100 | -0.20139300 | -1.27153500 |
| O  | 2.55081000  | 1.63047900  | -0.16209900 |
| H  | 3.50766200  | -1.95894400 | -0.07845300 |
| O  | 2.61406800  | -1.60665300 | -0.09521900 |
| H  | 0.02742800  | -0.75352800 | -2.05898100 |
| O  | -2.64438600 | 1.57858000  | -0.14259000 |
| H  | -3.29822400 | -2.28118900 | 0.17881200  |
| O  | -2.61366800 | -1.61806400 | 0.09770500  |
| H  | -0.04696500 | 0.57745800  | 2.19648400  |
| O  | -0.05396900 | 0.20369900  | 1.31058000  |
| H  | 2.65972900  | -0.88955800 | 1.68479100  |
| H  | -3.32677600 | 2.23964500  | -0.25209800 |
| H  | 3.02048400  | 2.44956200  | -0.31314800 |

TS1

|    |             |             |             |
|----|-------------|-------------|-------------|
| O  | 0.37647700  | 1.28149700  | 0.00895400  |
| Sc | 0.57822400  | -0.45673900 | 0.00609800  |
| O  | -1.50974800 | -0.15641200 | -0.09606300 |
| H  | -2.18950700 | -0.24672900 | 0.58096600  |
| H  | -0.88701400 | 0.83757900  | -0.01214800 |

TS2

|   |             |             |             |
|---|-------------|-------------|-------------|
| O | -1.75709700 | -0.85638700 | -0.17440600 |
| H | -2.61671500 | -0.41844900 | -0.23932600 |
| O | 1.58211700  | -1.07806000 | -0.07375400 |
| H | 2.40785800  | -1.54544900 | -0.19489400 |
| H | -1.47979400 | -0.72876500 | 1.14031100  |

|    |            |            |             |
|----|------------|------------|-------------|
| O  | 0.12682400 | 1.88053500 | -0.06337500 |
| H  | 0.43898800 | 2.77887500 | -0.17275000 |
| Sc | 0.07785300 | 0.01643300 | 0.09328300  |

TS3

|    |             |             |             |
|----|-------------|-------------|-------------|
| Sc | 1.65670300  | -0.36626300 | -0.05752700 |
| Sc | -0.96686500 | 0.74897700  | 0.03030200  |
| O  | 0.86457400  | 1.32222500  | -0.03309000 |
| O  | -0.10434800 | -1.11248400 | -0.00735100 |
| H  | 3.22240600  | -0.89769200 | 0.84113600  |
| O  | -2.41495400 | -0.78242100 | 0.05096100  |
| H  | -1.31765000 | -1.31471800 | -0.00083200 |
| H  | -3.15351300 | -1.24314400 | -0.35273300 |

TS4

|    |             |             |             |
|----|-------------|-------------|-------------|
| Sc | -0.84401500 | 0.03506100  | 0.25697000  |
| Sc | 1.91043400  | -0.02687000 | -0.14732300 |
| O  | 0.58017200  | 1.28089000  | 0.00958000  |
| O  | 0.52193500  | -1.27277700 | 0.08548500  |
| H  | -2.28927600 | 0.05568300  | 1.63992900  |
| O  | -2.82326700 | 0.03483000  | -0.54458000 |
| H  | -2.88716600 | 0.02263200  | 0.57526800  |
| H  | -3.44909400 | -0.59386300 | -0.92165500 |

TS5

|    |             |             |             |
|----|-------------|-------------|-------------|
| H  | -1.38519500 | 1.73335600  | 0.39934000  |
| Sc | 1.01458100  | 0.00891600  | -0.15543400 |
| Sc | -1.82415300 | -0.17531600 | 0.03290600  |
| O  | 2.87474100  | 0.03785500  | 0.20863800  |
| H  | 3.77821900  | -0.05946500 | 0.50866300  |
| O  | -0.43789200 | 1.31677600  | -0.14089400 |
| O  | -0.30880000 | -1.32410300 | 0.03710900  |
| H  | -2.41641200 | 1.57628400  | 0.82625000  |

TS6

|    |             |             |             |
|----|-------------|-------------|-------------|
| Sc | 1.31888400  | -0.05741500 | 0.15676100  |
| Sc | -1.44023700 | 0.66078600  | -0.00422800 |
| O  | 0.27128400  | 1.49395700  | -0.10875100 |
| O  | -0.34672300 | -1.03431400 | 0.27652200  |
| O  | -2.64951700 | -1.08935600 | -0.14337000 |
| H  | -1.50322100 | -1.42878100 | 0.05320900  |
| H  | -3.13392200 | -1.62249100 | -0.77894900 |
| O  | 3.12174000  | -0.49474000 | -0.26054900 |
| H  | 4.01129500  | -0.62390300 | -0.58826500 |

TS7

|    |             |             |             |
|----|-------------|-------------|-------------|
| H  | -0.10535900 | -0.44147000 | 2.34761900  |
| Sc | -1.61332800 | 0.09543300  | 0.00892100  |
| Sc | 1.35718300  | -0.04500100 | -0.08196600 |
| O  | -3.47482500 | -0.23534400 | -0.09869900 |
| H  | -4.32926900 | -0.50212900 | -0.43935300 |
| O  | 2.63961500  | -1.42487400 | -0.12246400 |
| H  | 3.34451100  | -2.05436100 | -0.26675000 |



|   |             |             |             |
|---|-------------|-------------|-------------|
| O | -0.25832500 | -0.14042600 | -1.23855600 |
| O | -0.19518500 | -0.30602300 | 1.40041100  |
| O | 1.87084900  | 1.78809200  | 0.08826700  |
| H | -0.30516600 | 1.78264000  | -0.30646300 |
| H | 2.11730300  | 2.70485000  | -0.03275900 |

TS8

|    |             |             |             |
|----|-------------|-------------|-------------|
| Sc | -1.53210300 | -0.00000600 | 0.49993400  |
| Sc | 0.90539300  | 0.00000600  | -0.30209100 |
| O  | -0.56961400 | 1.44551600  | -0.61656800 |
| O  | -0.56960400 | -1.44551300 | -0.61657600 |
| O  | 2.62675300  | -0.00000400 | 0.53886800  |
| H  | -0.39384700 | 0.00000400  | 2.00568900  |
| H  | 3.05424500  | -0.00001200 | 1.39880400  |
| H  | -0.69989300 | 2.31981100  | -1.00247900 |
| H  | -0.69987700 | -2.31980000 | -1.00250600 |

TS9

|    |             |             |             |
|----|-------------|-------------|-------------|
| H  | -0.23922500 | 1.33527600  | -1.54241400 |
| H  | -1.59371300 | 2.49310300  | -0.89422400 |
| H  | 0.12254700  | -1.17654600 | 2.00686800  |
| Sc | -1.56905600 | -0.12176400 | 0.10345100  |
| Sc | 1.61228600  | -0.02591900 | -0.03554400 |
| O  | -2.20928800 | 1.79493900  | -0.00292100 |
| H  | -3.08274100 | 2.20650300  | 0.04508600  |
| O  | -2.80071300 | -1.51641800 | -0.09288800 |
| H  | -3.35527400 | -2.23633900 | -0.39270300 |
| O  | 2.61741400  | 1.48604500  | 0.40879800  |
| H  | 3.26451200  | 2.16079400  | 0.61047600  |
| O  | 2.50815900  | -1.60765900 | -0.50277700 |
| H  | 3.19623700  | -2.22190100 | -0.75717200 |
| O  | 0.05257900  | -0.51988700 | 1.30634500  |
| O  | -0.07066900 | 0.43053800  | -1.17930000 |

TS10

|    |             |             |             |
|----|-------------|-------------|-------------|
| H  | -0.08815000 | -1.25466500 | -1.97802700 |
| H  | 0.11656600  | -0.21957600 | 2.25603000  |
| Sc | 1.57886000  | -0.14040700 | -0.04472500 |
| Sc | -1.64753400 | -0.24664400 | 0.05575500  |
| O  | 1.78340600  | 1.62505100  | -0.74844100 |
| H  | 2.41418300  | 2.28151500  | -1.04942600 |
| O  | 3.08358500  | -1.17576600 | 0.38534700  |
| H  | 3.87477300  | -1.68479400 | 0.55550700  |
| O  | -1.40665500 | 2.00393500  | 0.23295200  |
| H  | -1.34442900 | 2.47348700  | -0.61061200 |
| O  | -3.40224000 | -0.88710300 | -0.16728300 |
| H  | -4.28030800 | -1.26519000 | -0.14726200 |
| O  | 0.12159200  | 0.13976900  | 1.36392500  |
| O  | -0.01973800 | -0.99062100 | -1.05591900 |
| H  | -0.53008000 | 2.07518600  | 0.65750700  |
